# Supplementary material for: The p110αand p110βIsoforms of Class I Phosphatidylinositol 3-Kinase Are Involved in Toll-Like Receptor 5 Signaling in Epithelial Cells
Source: Hindawi journal article supplement (doi:10.1155/2010/652098), 2010-01-01

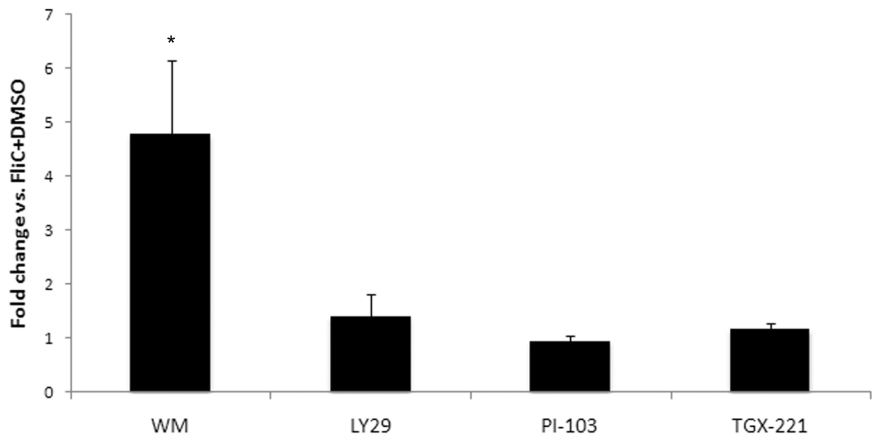

Supplement: f2 [file 652098.f2.pdf]
